# Supplementary material for: Design, Development, and Evaluation of Constant Voltage Iontophoresis for the Transungual Delivery of Efinaconazole
Source: MDPI journal article supplement (doi:10.3390/pharmaceutics15051422), 2023-05-06
Supplement: s1 [file s1]

# Design, Development, and Evaluation of Constant Voltage Iontophoresis for the Transungual Delivery of Efinaconazole

Anroop B. Nair, Bandar Aldhubiab, Jigar Shah, Shery Jacob, Mahesh Attimarad, Nagaraja Sreeharsha, Katharigatta N. Venugopala, Alex Joseph and Mohamed A. Morsy

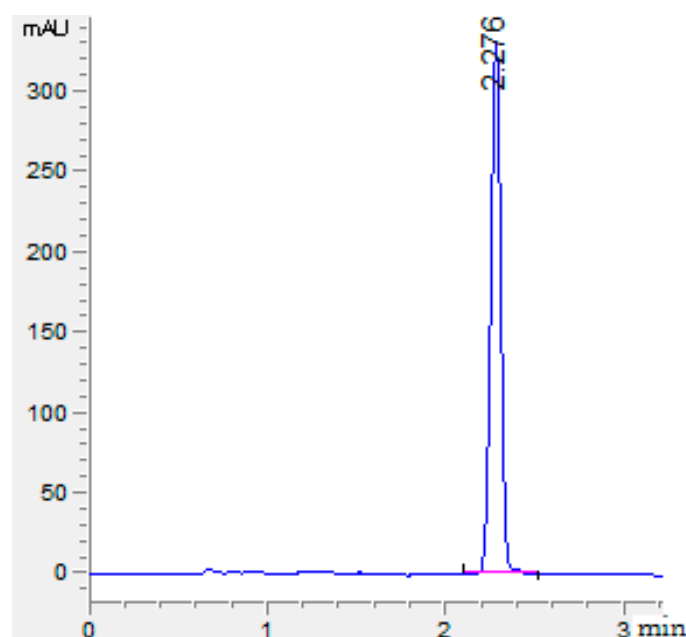

Figure S1. Representative HPLC chromatogram of efinaconazole.

| Scaled Estimates                       |                 |  |           |         |         |
|----------------------------------------|-----------------|--|-----------|---------|---------|
| Nominal factors expanded to all levels |                 |  |           |         |         |
| Term                                   | Scaled Estimate |  | Std Error | t Ratio | Prob> t |
| Intercept                              | 49.66827        |  | 0.482759  | 102.88  | <.0001* |
| Voltage range[4.5]                     | -22.26589       |  | 0.703737  | -31.64  | <.0001* |
| Voltage range[7.5]                     | -0.038118       |  | 0.638631  | -0.06   | 0.9539  |
| Voltage range[10.5]                    | 22.304007       |  | 0.661046  | 33.74   | <.0001* |
| Solvent:Cosolvent[1:0.5]               | -0.509859       |  | 0.661046  | -0.77   | 0.4627  |
| Solvent:Cosolvent[1:1]                 | 1.9378624       |  | 0.703737  | 2.75    | 0.0249* |
| Solvent:Cosolvent[1.5:1]               | -1.428003       |  | 0.638631  | -2.24   | 0.0558  |
| Enhancer- PEG400[20]                   | -3.993007       |  | 0.703737  | -5.67   | 0.0005* |
| Enhancer- PEG400[25]                   | -0.077471       |  | 0.661046  | -0.12   | 0.9096  |
| Enhancer- PEG400[30]                   | 4.0704782       |  | 0.638631  | 6.37    | 0.0002* |

Figure S2. Scaled estimates for drug permeation. \*significant

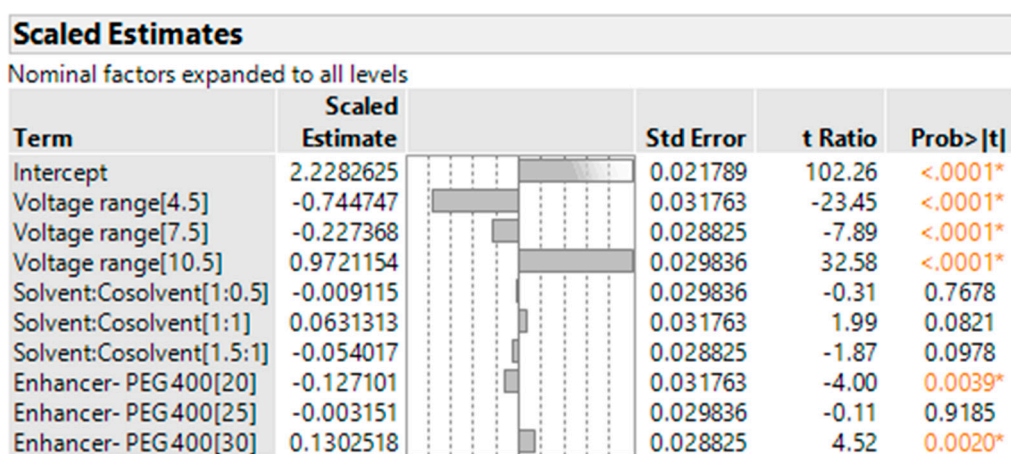

Figure S3. Scaled estimates for drug loading. \*significant
